# Supplementary material for: Deciphering the spatiotemporal dynamics and source characteristics of nutrients under anthropogenic pressure in Taipu River, China
Source: Research Square preprint supplement (doi:10.21203/rs.3.rs-7080818/v1), 2025-08-06
Supplement: Supplementary file 1 [file dae23f0d1e6f677067918d56.docx]

**Supplementary Information**

**for**

**Deciphering the spatiotemporal dynamics** **and source characteristics of nutrients under anthropogenic pressure in Taipu river, China**

Tong Wang a,b, Jiayi Koua, Fengjunxi Chena, Yalong Lia, Yaojen Tua,b*, Yanping Duana,b

*a School of Environmental and Geographical Sciences, Shanghai Normal University, Shanghai 200234, China*

*b Yangtze River Delta Urban Wetland Ecosystem National Field Observation and Research Station, Shanghai Normal University, Shanghai* *200234, China*

*** Corresponding author:**

Email address: yjtu@shnu.edu.cn

**Supporting Information includes 9 pages, 4 tables**

**Contents**

**Table S1** Latitude and longitude of sampling points in the Taipu River

**Table S2** Water characteristics in the Taipu River during four seasons

**Table S3** Evaluation standard of comprehensive pollution index and Nemerow pollution index

**Table S4** Correlation analysis of water quality index in T7 site. Asterisks indicate significance (* *P*<0.05; ns *P*>0.05)

**Table S1** Latitude and longitude of sampling points in the Taipu River

| Sampling points | Name | Longitude and latitude | Sampling points | Name | Longitude and latitude |
| --- | --- | --- | --- | --- | --- |
| T1 | Miaogang Bridge | 120.48°N, 31.01°E | T9 | Punan Road | 120.84°N, 31.02°E |
| T2 | Taipu River Bridge | 120.51°N, 31.01°E | T10 | Fenhu Beidge | 120.87°N, 31.02°E |
| T3 | Hengshan Bridge | 120.53°N, 31.01°E | T11 | Green embankment of Taipu Rive | 120.90°N, 31.02°E |
| T4 | Meiyan Bridge | 120.59°N, 31.00°E | T12 | Caitiantao Gate | 120.95°N, 31.02°E |
| T5 | Pingwang Bridge | 120.64°N, 31.00°E | T13 | Lianshengshu River | 120.98°N, 31.02°E |
| T6 | Hujing North Road | 120.70°N, 31.00°E | T14 | Jinqian Bridge | 121.04°N, 31.03°E |
| T7 | Chahugang Bridge | 120.71°N, 31.00°E | T15 | Confluence of Mao River and Taipu River | 121.17°N, 31.03°E |
| T8 | Wujiang Huayuan Petroleum Co. | 120.78°N, 31.01°E |  |  |  |

**Table S2** Water characteristics in the Taipu River during four seasons

| Samples | Period | pH | DO  (mg L-1) | Eh  (mV) | COD  (mg L-1) | TN  (mg L-1) | TP  (mg L-1) | F-  (mg L-1) | Cl-  (mg L-1) | SO42-  (mg L-1) |
| --- | --- | --- | --- | --- | --- | --- | --- | --- | --- | --- |
| T1 | Spring | 6.20 | 9.12 | 245.0 | 26 | 0.17 | 0.09 | 0.33 | 47.27 | 42.58 |
| T2 | 6.45 | 6.52 | 237.6 | 27 | 0.17 | 0.03 | 0.34 | 38.31 | 42.64 |
| T3 | 6.72 | 8.46 | 262.3 | 19 | 0.17 | 0.10 | 0.32 | 39.16 | 43.37 |
| T4 | 6.74 | 8.56 | 235.5 | 28 | 0.17 | 0.04 | 0.33 | 43.14 | 47.51 |
| T5 | 7.08 | 9.83 | 196.5 | 35 | 0.17 | 0.03 | 0.32 | 38.50 | 42.76 |
| T6 | 7.03 | 9.10 | 210.5 | 21 | 0.17 | 0.05 | 0.37 | 56.79 | 74.24 |
| T7 | 7.04 | 8.57 | 192.0 | 34 | 1.18 | 0.04 | 0.38 | 82.94 | 141.28 |
| T8 | 7.05 | 9.71 | 218.6 | 19 | 0.16 | 0.04 | 0.36 | 53.76 | 68.18 |
| T9 | 6.23 | 7.18 | 484.2 | 24 | 0.18 | 0.04 | 0.35 | 54.96 | 66.61 |
| T10 | 6.99 | 6.85 | 202.8 | 24 | 0.17 | 0.05 | 0.37 | 59.48 | 71.46 |
| T11 | 7.25 | 10.34 | 208.8 | 29 | 0.95 | 0.04 | 0.39 | 60.75 | 77.45 |
| T12 | 6.54 | 9.56 | 246.6 | 21 | 0.18 | 0.03 | 0.39 | 62.16 | 75.76 |
| T13 | 6.83 | 8.86 | 226.8 | 26 | 0.18 | 0.04 | 0.38 | 57.91 | 72.69 |
| T14 | 6.94 | 9.66 | 234.6 | 34 | 0.18 | 0.04 | 0.38 | 54.88 | 69.78 |
| T15 | 6.24 | 9.51 | 220.4 | 34 | 0.18 | 0.04 | 0.37 | 67.04 | 89.84 |
| Samples | Period | pH | DO  (mg L-1) | Eh  (mV) | COD  (mg L-1) | TN  (mg L-1) | TP  (mg L-1) | F-  (mg L-1) | Cl-  (mg L-1) | SO42-  (mg L-1) |
| T1 | Summer | 7.06 | 5.94 | 66.5 | 15 | 1.01 | 0.00 | 0.64 | 32.41 | 39.49 |
| T2 | 6.31 | 5.53 | 89.8 | 20 | 1.00 | 0.06 | 0.54 | 32.94 | 41.66 |
| T3 | 7.18 | 6.52 | 50.4 | 13 | 0.97 | 0.05 | 0.58 | 30.99 | 38.67 |
| T4 | 6.97 | 5.77 | 47.8 | 1 | 1.13 | 0.07 | 0.62 | 32.45 | 39.63 |
| T5 | 5.94 | 4.79 | 67.1 | 13 | 1.33 | 0.05 | 0.76 | 38.79 | 43.30 |
| T6 | 6.57 | 4.73 | 52.6 | 12 | 1.56 | 0.03 | 0.58 | 39.86 | 51.24 |
| T7 | 6.41 | 4.77 | 56.2 | 24 | 2.19 | 0.13 | 0.66 | 104.92 | 144.04 |
| T8 | 5.74 | 3.94 | 92.8 | 16 | 1.75 | 0.14 | 0.80 | 45.51 | 58.99 |
| T9 | 6.08 | 4.66 | 112.5 | 15 | 1.76 | 0.06 | 0.78 | 50.46 | 65.86 |
| T10 | 6.00 | 4.80 | 82.8 | 14 | 1.67 | 0.11 | 0.86 | 49.20 | 67.06 |
| T11 | 6.41 | 5.66 | 126.5 | 9 | 1.53 | 0.08 | 0.75 | 48.59 | 63.24 |
| T12 | 5.93 | 4.95 | 106.5 | 16 | 1.52 | 0.05 | 1.00 | 53.78 | 71.07 |
| T13 | 6.17 | 5.68 | 115.7 | 15 | 1.05 | 0.07 | 0.88 | 80.00 | 108.66 |
| T14 | 6.07 | 5.54 | 118.8 | 16 | 1.47 | 0.12 | 0.64 | 58.66 | 74.54 |
| T15 | 6.35 | 4.86 | 110.3 | - | 1.41 | 0.13 | 0.88 | 60.03 | 77.34 |
| Samples | Period | pH | DO  (mg L-1) | Eh  (mV) | COD  (mg L-1) | TN  (mg L-1) | TP  (mg L-1) | F-  (mg L-1) | Cl-  (mg L-1) | SO42-  (mg L-1) |
| T1 | Autumn | 7.41 | 4.38 | 191.4 | - | 0.25 | 0.01 | 0.35 | 34.09 | 32.61 |
| T2 | 7.20 | 5.39 | 217.3 | 33 | 0.39 | 0.02 | 0.34 | 28.07 | 32.06 |
| T3 | 6.70 | 6.34 | 194.5 | 32 | 0.34 | 0.03 | 0.36 | 30.51 | 33.03 |
| T4 | 6.64 | 7.42 | 198.1 | 29 | 0.49 | 0.03 | 0.37 | 28.55 | 31.29 |
| T5 | 6.70 | 5.61 | 160.2 | 25 | 0.52 | 0.03 | 0.39 | 32.62 | 36.45 |
| T6 | 6.72 | 7.23 | 237.7 | 32 | 0.66 | 0.05 | 0.39 | 32.89 | 39.13 |
| T7 | 8.22 | 4.31 | 101.8 | 53 | 0.66 | 0.04 | 0.41 | 42.42 | 225.89 |
| T8 | 7.01 | 6.93 | 187.4 | 32 | 0.74 | 0.02 | 0.40 | 33.05 | 43.17 |
| T9 | 6.41 | 4.85 | 208.5 | 33 | 0.75 | 0.06 | 0.41 | 39.29 | 40.84 |
| T10 | 6.37 | 5.14 | 186.7 | 28 | 0.71 | 0.06 | 0.42 | 37.49 | 42.21 |
| T11 | 6.45 | 6.74 | 227.1 | 37 | 0.76 | 0.06 | 0.41 | 37.09 | 42.23 |
| T12 | 6.42 | 7.01 | 201.8 | 31 | 0.75 | 0.06 | 0.46 | 38.07 | 42.67 |
| T13 | 6.52 | 7.32 | 184.8 | 31 | 0.82 | 0.06 | 0.43 | 44.57 | 43.86 |
| T14 | 6.54 | 8.10 | 190.0 | 33 | 1.19 | 0.06 | 0.54 | 45.78 | 54.95 |
| T15 | 6.57 | 6.42 | 196.4 | 33 | 0.97 | 0.07 | 0.52 | 41.34 | 51.03 |
| Samples | Period | pH | DO  (mg L-1) | Eh  (mV) | COD  (mg L-1) | TN  (mg L-1) | TP  (mg L-1) | F-  (mg L-1) | Cl-  (mg L-1) | SO42-  (mg L-1) |
| T1 | Winter | 6.10 | 10.11 | 227.5 | 17 | 1.22 | 0.14 | 0.45 | 56.12 | 41.03 |
| T2 | 6.35 | 9.37 | 265.8 | 13 | 0.77 | 0.25 | 0.45 | 51.82 | 43.28 |
| T3 | 6.37 | 9.23 | 278.5 | 11 | 0.73 | 0.18 | 0.40 | 51.70 | 43.10 |
| T4 | 6.19 | 9.17 | 278.6 | 0 | 0.64 | 0.14 | 0.39 | 46.85 | 45.47 |
| T5 | 6.07 | 9.02 | 281.4 | 11 | 0.85 | 0.14 | 0.38 | 48.82 | 51.03 |
| T6 | 6.34 | 8.17 | 247.8 | 10 | 1.41 | 0.14 | 0.39 | 58.89 | 70.78 |
| T7 | 8.18 | 3.25 | 168.2 | 46 | 2.01 | 0.10 | 0.38 | 82.69 | 223.80 |
| T8 | 6.12 | 8.78 | 242.9 | 7 | 1.32 | 0.14 | 0.39 | 58.02 | 72.85 |
| T9 | 6.52 | 7.95 | 250.5 | 0 | 1.34 | 0.14 | 0.40 | 58.42 | 69.38 |
| T10 | 6.12 | 8.11 | 235.6 | 8 | 1.31 | 0.14 | 0.40 | 60.59 | 68.13 |
| T11 | 6.28 | 8.79 | 262.8 | 3 | 1.30 | 0.14 | 0.39 | 58.48 | 67.96 |
| T12 | 6.55 | 8.09 | 248.2 | 11 | 1.75 | 0.08 | 0.40 | 62.98 | 80.61 |
| T13 | 6.51 | 8.32 | 257.8 | 9 | 2.54 | 0.08 | 0.42 | 76.18 | 113.45 |
| T14 | 6.86 | 8.02 | 256.5 | 13 | 1.66 | 0.13 | 0.41 | 65.42 | 81.44 |
| T15 | 6.87 | 9.43 | 262.3 | 14 | 2.16 | 0.11 | 0.41 | 74.41 | 100.36 |

**Table S3** Evaluation standard of comprehensive pollution index and Nemerow pollution index

| Comprehensive pollution index | | Nemerow pollution index | |
| --- | --- | --- | --- |
|  | Contamination assessment |  | Contamination assessment |
|  | Cleanness |  | Uncontaminated |
|  | Sub-cleanness |  | Slightly contaminated |
|  | Slight contamination |  | Lightly contaminated |
|  | Medium contamination |  | Moderately contaminated |
|  | Heavy contamination |  | Seriously contaminated |

·

**Table S4** Correlation analysis of water quality index in T7 site. Asterisks indicate significance (* *P* < 0.05; ns *P* > 0.05)

| TN | Pearson *r* | *P* | TP | Pearson *r* | *P* | COD | Pearson *r* | *P* |
| --- | --- | --- | --- | --- | --- | --- | --- | --- |
| pH | -0.449 | ns | pH | -0.430 | ns | pH | 0.978 | * |
| DO | -0.325 | ns | DO | -0.509 | ns | DO | -0.408 | ns |
| Eh | -0.207 | ns | Eh | -0.511 | ns | Eh | 0.280 | ns |
| COD | -0.613 | ns | COD | -0.558 | ns | TN | -0.613 | ns |
| TP | 0.942 | ns | TN | 0.942 | ns | TP | -0.558 | ns |
| F- | 0.564 | ns | F- | 0.741 | ns | F- | -0.736 | ns |
| Cl- | 0.878 | ns | Cl- | 0.756 | ns | Cl- | -0.891 | ns |
| Br- | -0.682 | ns | Br- | -0.523 | ns | Br- | -0.067 | ns |
| SO42- | -0.282 | ns | SO42- | -0.183 | ns | SO42- | 0.917 | ns |
